# Supplementary material for: Short-term exposure testing of six different passive samplers for the monitoring of hydrophobic contaminants in water
Source: Royal Society of Chemistry journal article supplement (doi:10.1039/b921326k), 2010-01-01
Supplement: b921326k.pdf [file b921326k.pdf]

## Supporting Information

# Short-term exposure testing of six different passive samplers for the monitoring of hydrophobic contaminants in water

Ian J. Allan,<sup>a,\*</sup> Kees Booij,<sup>b</sup> Albrecht Paschke,<sup>c</sup> Branislav Vrana,<sup>d</sup> Graham A. Mills<sup>e</sup> and Richard Greenwood<sup>f</sup>

<sup>a</sup>Norwegian Institute for Water Research, Gaustadalléen 21, NO-0349 Oslo, Norway, Fax/Phone+4722185200/5100, e-mail: [ian.allan@niva.no](mailto:ian.allan@niva.no)

<sup>b</sup>Royal Netherlands Institute for Sea Research, PO Box 59, 1790 AB Texel, The Netherlands

<sup>c</sup>Department of Ecological Chemistry, UFZ-Helmholtz Centre for Environmental Research, Permoserstrasse 15, 04318 Leipzig, Germany

<sup>d</sup>National Water Reference Laboratory for Slovakia, Water Research Institute, Nabr. arm. gen. L. Svobodu 5, 81249 Bratislava, Slovakia

<sup>e</sup>School of Pharmacy and Biomedical Sciences, University of Portsmouth, White Swan Road, Portsmouth, PO1 2DT, UK

<sup>f</sup>School of Biological Sciences, University of Portsmouth, King Henry I Street, Portsmouth, PO1 2DY, UK

\*Email: [ian.allan@niva.no](mailto:ian.allan@niva.no)

Tel. +47 22 18 51 00

Fax: +47 22 18 52 00

## Material and methods

**Table SI-1** presents all compounds for which analysis was carried out, whether they were detected or not, in extracts of the various passive samplers. If analytes were not detected, estimates of limits of detection are also provided. All analytes were spiked into the river water during this test except 1-methylnaphthalene, 2-methylnaphthalene and 2,6-dimethylnaphthalene which were analysed in extracts from MESCO II and silicone rod samplers but were not part of the list of analytes spiked in the river water for the purpose of this test. The source of log  $K_{OW}$  values for the PRCs is given in the main text.

**Table SI-1.** List of chemicals analysed and/or detected by the various passive sampling devices tested in this study

| Analyte                 | Log $K_{ow}$ | Chemcatcher | SPMD | Silicone strip | MESCO I (m) | MESCO II | Silicone rod |
|-------------------------|--------------|-------------|------|----------------|-------------|----------|--------------|
| 1-Methylnaphthalene     | 3.86         |             |      |                |             | A/D      | A/D          |
| 2-Methylnaphthalene     | 3.86         |             |      |                |             | A/D      | A/D          |
| Biphenyl                | 3.90         |             |      |                |             | A/D      | A/D          |
| 2,6-Dimethylnaphthalene | 4.37         |             |      |                |             | A/D      | A/D          |
| Acenaphthylene          | 3.9          | A/D         | A/D  |                |             | A/D      | A/D          |
| Acenaphthene            | 3.92         | A/D         | A/D  | A/D            |             | A/D      | A/D          |
| Fluorene                | 4.18         | A/D         | A/D  | A/D            | A/D         | A/D      | A/D          |
| Phenanthrene            | 4.57         | A/D         | A/D  | A/D            | A/D         | A/D      | A/D          |
| Anthracene              | 4.54         | A/D         | A/D  | A/D            | A/D         | A/D      | A/D          |
| Fluoranthene            | 5.22         | A/D         | A/D  | A/D            | A/D         | A/D      | A/D          |
| Pyrene                  | 5.18         | A/D         | A/D  | A/D            | A/D         | A/D      | A/D          |
| Benz[a]anthracene       | 5.91         | A/D         | A/D  | A/D            | A/D         | A/D      | A/D          |
| Chrysene                | 5.86         | A/D         | A/D  | A/D            | A/D         | A/D      | A/D          |
| Benzo[b]fluoranthene    | 5.80         | A/D         | A/D  | A/D            | A/D         | A/D      | A/D          |
| Benzo[k]fluoranthene    | 6.00         | A/D         | A/D  |                | A/D         | A/D      | A/D          |
| Benzo[a]pyrene          | 6.04         | A/D         | A/D  | A/D            | A/D         | A/D      | A/D          |
| Indeno[1,2,3-cd]pyrene  | 6.50         | A (20)      | A/D  | A/D            |             |          |              |
| Dibenz[a,h]anthracene   | 6.75         | A (20)      | A/D  | A/D            |             |          |              |

|                                                                                                                                                             |      |        |     |     |     |     |     |
|-------------------------------------------------------------------------------------------------------------------------------------------------------------|------|--------|-----|-----|-----|-----|-----|
| Benzo[ghi]perylene                                                                                                                                          | 6.50 | A (20) | A/D | A/D |     |     |     |
| Hexachlorobenzene                                                                                                                                           | 5.50 | A/D    | A/D | A/D | A/D | A/D | A/D |
| CB28                                                                                                                                                        | 5.67 |        | A/D | A/D | A/D | A/D | A/D |
| CB52                                                                                                                                                        | 5.84 |        | A/D | A/D | A/D | A/D | A/D |
| CB101                                                                                                                                                       | 6.38 |        | A/D | A/D | A/D | A/D | A/D |
| p,p'-DDE                                                                                                                                                    | 6.14 | A/D    | A/D | A/D | A/D | A/D | A/D |
| CB118                                                                                                                                                       | 6.74 |        | A/D | A/D |     |     |     |
| CB138                                                                                                                                                       | 6.86 |        | A/D | A/D | A/D | A/D | A/D |
| CB153                                                                                                                                                       | 6.92 |        | A/D | A/D | A/D | A/D | A/D |
| CB180                                                                                                                                                       | 7.36 |        | A/D | A/D | A/D | A/D | A/D |
| A: analysed and D: detected; if compound was analysed but was not detected, then value in bracket is the estimated limit of detection (ng L <sup>-1</sup> ) |      |        |     |     |     |     |     |

Performance reference compounds (PRCs) spiked into the various types of passive sampling devices tested in this study are listed in **Table SI-2**. The source of log  $K_{OW}$  values for the PRCs is given in the main text.

**Table SI-2.** PRC spiked into the different passive sampling devices used during this tank test

|                       | Sampler type |             |      |                |             |          |              |
|-----------------------|--------------|-------------|------|----------------|-------------|----------|--------------|
|                       | Log $K_{OW}$ | Chemcatcher | SPMD | Silicone strip | MESCO I (m) | MESCO II | Silicone rod |
| BIP-d <sub>10</sub>   | 3.9          | ✓           |      |                |             |          |              |
| ACE- d <sub>10</sub>  | 3.92         | ✓           | ✓    | ✓              |             |          |              |
| FLUE- d <sub>10</sub> | 4.18         | ✓           | ✓    |                |             | ✓        | ✓            |
| PHE- d <sub>10</sub>  | 4.57         | ✓           | ✓    | ✓              |             | ✓        | ✓            |
| ANT- d <sub>10</sub>  | 4.54         |             |      |                |             | ✓        | ✓            |
| FLUO- d <sub>10</sub> | 5.22         |             | ✓    | ✓              |             | ✓        | ✓            |
| PYR- d <sub>10</sub>  | 5.18         | ✓           |      |                |             | ✓        | ✓            |
| CHRY- d <sub>12</sub> | 5.86         |             | ✓    |                |             |          |              |
| BaA- d <sub>12</sub>  | 5.91         |             |      |                |             | ✓        | ✓            |
| CB004                 | 4.9          |             |      | ✓              |             |          |              |
| CB155                 | 6.41         |             |      | ✓              |             |          |              |
| CB204                 | 7.3          |             |      | ✓              |             |          |              |

BIP: biphenyl; ACE: acenaphthene; FLUE: fluorene; PHE: phenanthrene; ANT: anthracene; FLUO: fluoranthene; PYR: pyrene; CHRY: chrysene; BaA: benzo[a]anthracene; CB: chlorinated biphenyl.
